# Supplementary material for: β Boswellic Acid Blocks Articular Innate Immune Responses: An In Silico and In Vitro Approach to Traditional Medicine
Source: MDPI journal article supplement (doi:10.3390/antiox12020371), 2023-02-03
Supplement: s1 [file s1]

## Supplementary Figures

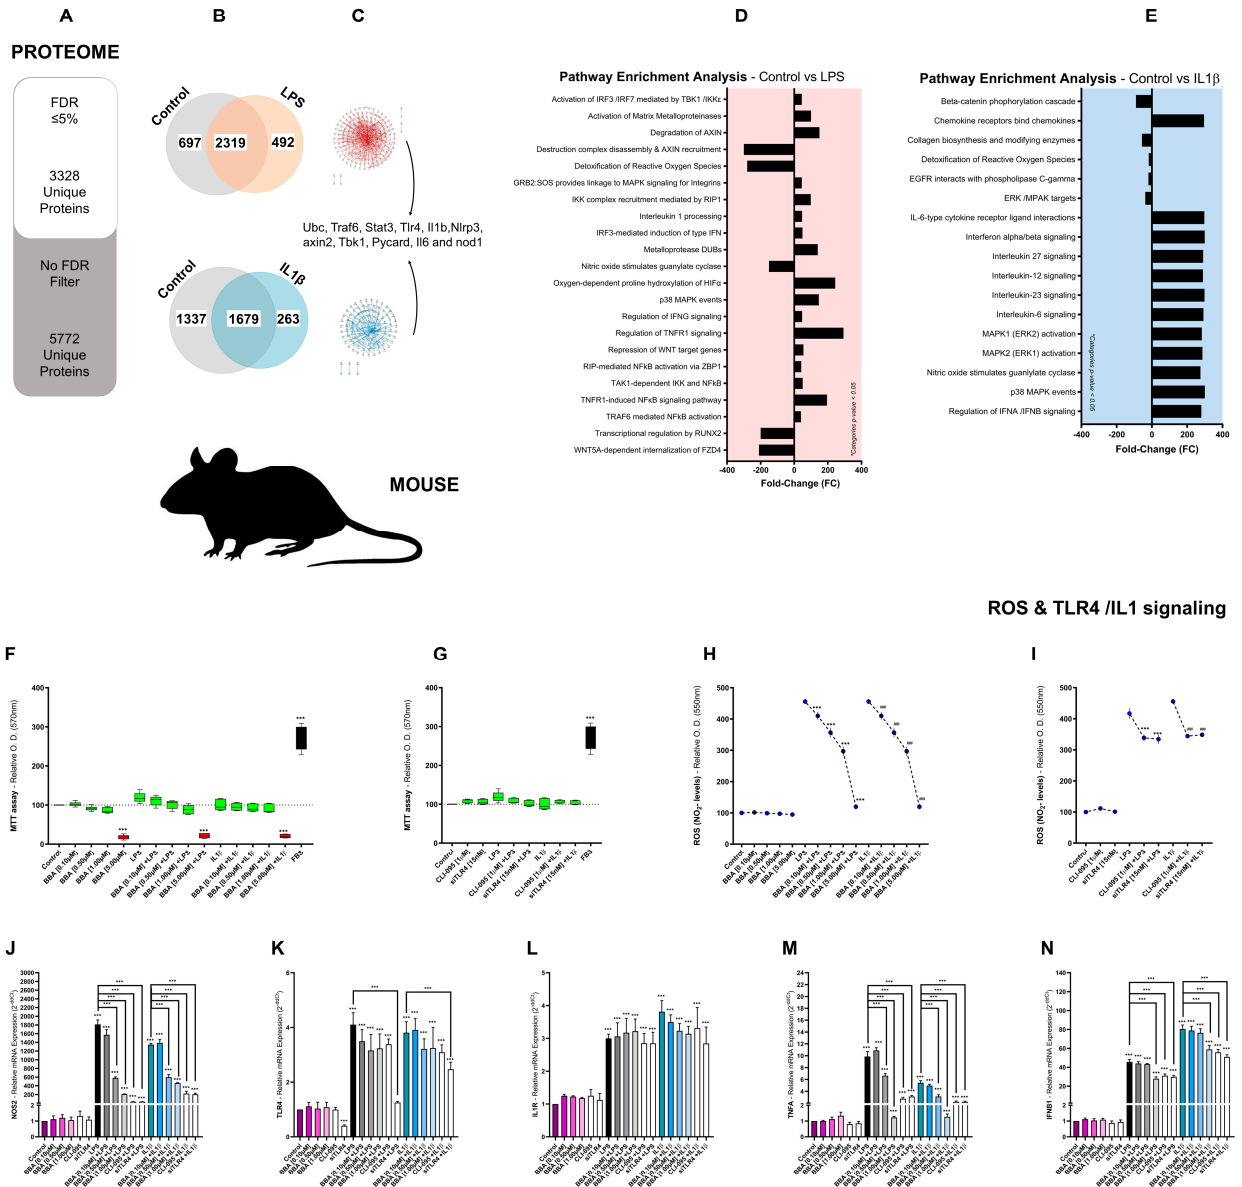

**Figure S1.** BBA effects on the proteome and transcriptome of TLR4 /IL1R-mediated innate immune responses in mouse ATDC5 chondrocytes: (A-E) Proteome profile by DDA MALDI-TOFF of mice ATDC5 chondrocytes stimulated with LPS [100ng/ml] or IL1 $\beta$  [0.1ng/ml] for 48h. Independent biological replicates (n=3) were normalized (control) and expressed as the mean  $\pm$ SEM; (A) Mice proteome profile of non-filtered (FDR $\leq 0\%$  = 5772) and filtered (FDR $\leq 5\%$  = 3328) cellular proteins; (B) Venn diagram (FDR $\leq 5\%$ ) of TLR4 (LPS) /IL1R (IL1 $\beta$ )-activated and non-activated (Control) mice ATDC5 chondrocytes proteome; (C) Interactome plot (FDR $\leq 5\%$ ) of TLR4 /IL1R-activated mice ATDC5 chondrocytes proteome; (D-E) Pathway Enrichment Analysis (FDR $\leq 5\%$ ; fold-change) of TLR4 /IL1R-activated mice ATDC5 chondrocytes proteome. (F-N) Mouse ATDC5 chondrocytes were treated with BBA [0.10-5.00 $\mu$ M], CLI-095 [1 $\mu$ M] or siTLR4 [15nM] for 24h and cotreated with LPS [100ng/ml] or IL1 $\beta$  [0.1ng/ml] for another 48h. Independent biological replicates (n=6) were normalized (control) and expressed as the mean  $\pm$ SEM; (F, G) MTT cell viability assay in ATDC5 chondrocytes displaying cell inviable doses (red), cell-viable doses (green) and FBS as a positive control; (H, I) Griess - ROS assay

measuring NO<sub>2</sub> levels in ATDC5 chondrocytes; (J-N): RT-qPCR gene expression (mRNA) of NOS2, TLR4, IL1R, TNF $\alpha$  and IFN $\beta$ 1 in ATDC5 chondrocytes.

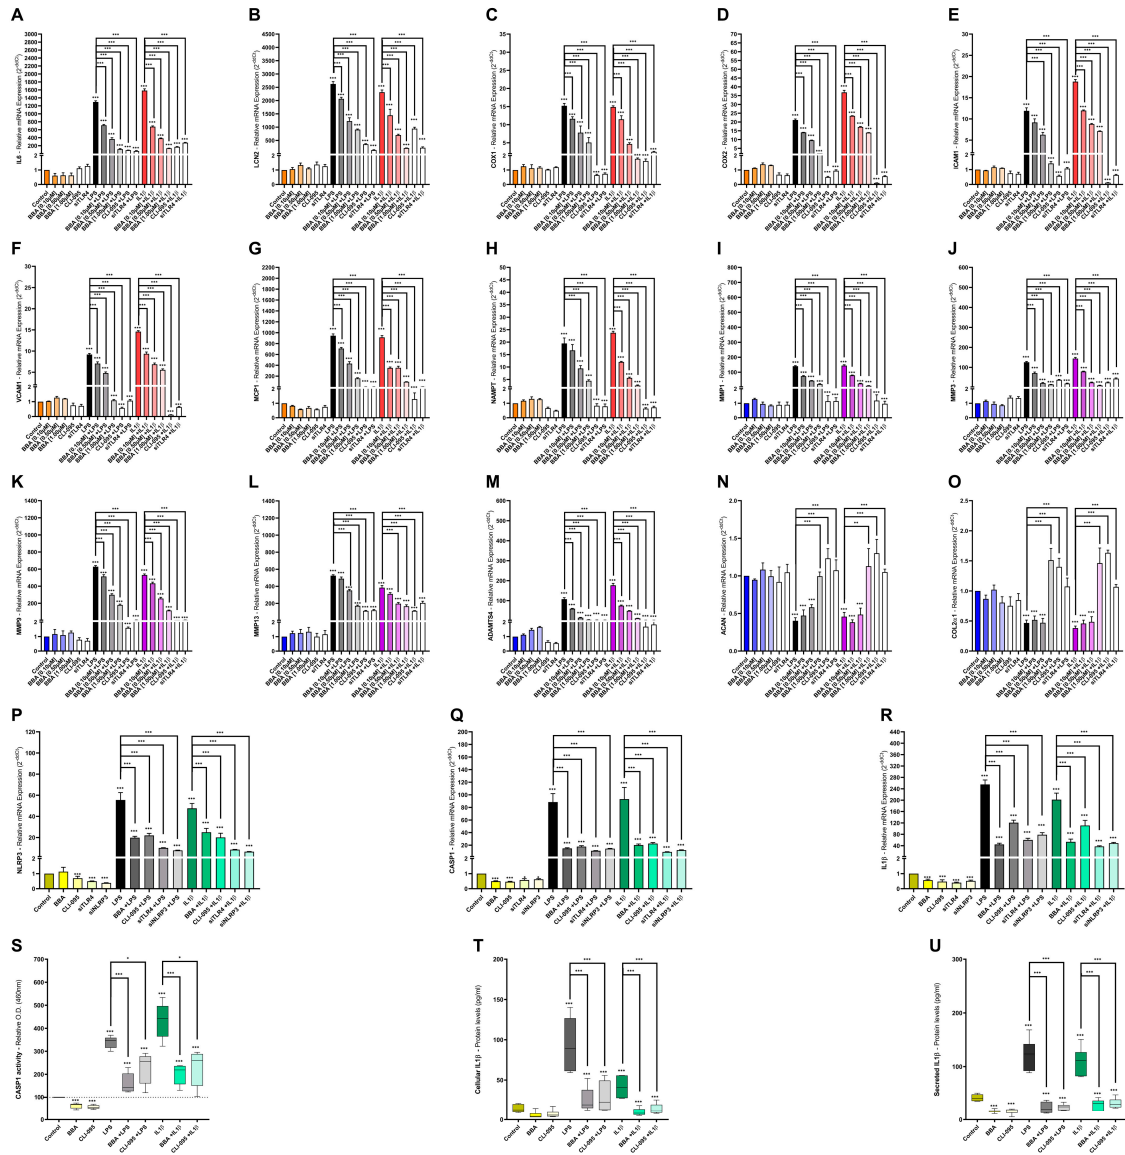

**Figure S2.** BBA effects on the transcriptome of TLR4/IL1R-mediated innate immune responses in mouse ATDC5 chondrocytes: (A-U) Mouse ATDC5 chondrocytes were treated with BBA [0.10-5.00 $\mu$ M], CLI-095 [1 $\mu$ M] or siTLR4 [15nM] for 24h and cotreated with LPS [100ng/ml] or IL1 $\beta$  [0.1ng/ml] for another 48h. Independent biological replicates (n=6) were normalized (control) and expressed as the mean  $\pm$ SEM. (A-R) RT-qPCR gene expression (mRNA) of IL6, LCN2, COX1, COX2, ICAM1, VCAM1, MCP1, NAMPT, MMP-1, -3, -9, -13, ADAMTS4, ACAN, COL2 $\alpha$ 1, NLRP3, CASP1 and IL1 $\beta$  in ATDC5 chondrocytes; (S) CASP1 activity (pNa reaction) assay in mice ATDC5 chondrocytes; (T-U): ELISA of cellular (T) and secreted (U) IL1 $\beta$  protein (pg/ml) in mice ATDC5 chondrocytes.
