# Supplementary material for: β Boswellic Acid Blocks Articular Innate Immune Responses: An In Silico and In Vitro Approach to Traditional Medicine
Source: Antioxidants (Basel). 2023 Feb 3;12(2):371. doi: 10.3390/antiox12020371 (PMC9952103; doi:10.3390/antiox12020371)
Supplement: Supplementary file 1 [file antioxidants-12-00371-s001.zip › Supplementary data S1.xlsx]

## Sheet: Primers Dataset
HUMAN (H_) /MOUSE (M_)	RefSeq	Forward (5’-3’) primer: Melting TºC & Sequence		Reverse (3’-5’) primer: Melting TºC & Sequence
H_ADAMTS4_1	NM_005099	56.1	AGAAGAAGTTTGACAAGTGC	57.8	CACATTGTTGTATCCGTACC
H_CASP1_1	NM_001257118	55.7	CAACTACAGAAGAGTTTGAGG	56.5	AACATTATCTGGTGTGGAAG
H_CCL2_1	NM_002982	57.1	AGACTAACCCAGAAACATCC	59.8	ATTGATTGCATCTGGCTG
H_HPRT1_1	NM_000194	56.8	ATAAGCCAGACTTTGTTGG	57.0	ATAGGACTCCAGATGTTTCC
H_IL1B_1	NM_000576	56.5	CTAACAGATGAAGTGCTCC	59.6	GGTCATTCTCCTGGAAGG
H_IL1R1_1	NM_000877	57.5	ATTTAAGCAGAAACTACCCG	57.7	TTGCAATCCTTATACCACTG
H_IL6_1	NM_000600	60.4	GCAGAAAAAGGCAAAGAATC	58.5	CTACATTTGCCGAAGAGC
H_LCN2_2	NM_005564	58.7	CTGGATCAGGACTTTTGTTC	57.2	AGGTAACTCGTTAATCCAGG
H_MMP1_1	NM_001145938	58.6	AAAGGGATAAGTACTGGGC	58.2	CAGTGTTTTCCTCAGAAAGAG
H_MMP13_1	NM_002427	56.1	AGGCTACAACTTGTTTCTTG	56.4	AGGTGTAGATAGGAAACATGAG
H_MMP3_1	NM_002422	54.7	GCAGTTAGAGAACATGGAG	59.3	ACGAGAAATAAATTGGTCCC
H_MMP9_1	NM_004994	56.4	AAGGATGGGAAGTACTGG	58.2	GCCCAGAGAAGAAGAAAAG
H_NAMPT_1	NM_005746	59.8	CTAATGGCCTTGGGATTAAC	58.9	TCCAGTGTAACAAAATTCCC
H_NLRP3_1	NM_001243133	55.5	AGGTGTTGGAATTAGACAAC	57.8	AATACATTTCAGACAACCCC
H_NOS2_1	NM_000625	59.4	AGCTCAACAACAAATTCAGG	60.1	ATCAATGTCATGAGCAAAGG
H_PTGS1_2 (=COX1)	NM_000962	59.6	GTTCTGGGAGTTTGTCAATG	54.9	GAGTGTAATAGCTCACGTTG
H_PTGS2_2 (=COX2)	NM_000963	56.8	AAGCAGGCTAATACTGATAGG	56.8	TGTTGAAAAGTAGTTCTGGG
H_TLR4_1	NM_003266	61.0	GATTTATCCAGGTGTGAAATCC	55.0	TATTAAGGTAGAGAGGTGGC
M_ADAMTS4_1	NM_172845	58.5	AAAATTCAGGTATGGATACAGC	57.7	GTGTATTCACCATTGAGGG
M_CASP1_1	NM_009807	61.1	GGGACATTAAACGAAGAATCC	60.4	GGAAGTATTGGCTTCTTATTGG
M_CCL2_1	NM_011333	58.6	CAAGATGATCCCAATGAGTAG	57.8	TTGGTGACAAAAACTACAGC
M_HPRT_1	NM_013556	61.4	AGGGATTTGAATCACGTTG	58.8	TTTACTGGCAACATCAACAG
M_IL1B_1	NM_008361	59.4	GGATGATGATGATAACCTGC	60.8	CATGGAGAATATCACTTGTTGG
M_IL1R1_1	NM_001123382	57.5	AAAGCTTCAGATGGAAAGAC	57.2	AACCTCGATGGTATCTTCTC
M_IL6_1	NM_031168	58.0	AAGAAATGATGGATGCTACC	53.9	GAGTTTCTGTATCTCTCTGAAG
M_LCN2_2	NM_008491	56.6	ATATGCACAGGTATCCTCAG	58.9	GAAACGTTCCTTCAGTTCAG
M_MMP1_1	NM_032006	61.2	CAAGTCCGCTATTTCAAAGG	57.6	ACATGTTGGTCAACAAAGAAG
M_MMP13_1	NM_008607	59.8	CTTTAGAGGGAGAAAATTCTGG	59.0	CATCATCATAACTCCACACG
M_MMP3_1	NM_010809	58.2	AGTCTACAAGTCCTCCACAG	54.3	TTGGTGATGTCTCAGGTTCC
M_MMP9_1	NM_013599	56.4	CTTCCAGTACCAAGACAAAG	59.1	ACCTTGTTCACCTCATTTTG
M_NAMPT_1	NM_021524	57.8	CAAGAGATTGTAGAGGGAATG	56.0	TCTCGGGTTAACTTCTGTAG
M_NLRP3_1	NM_145827	58.8	GATGCTGGAATTAGACAACTG	56.1	GTACATTTCACCCAACTGTAG
M_NOS2_1	NM_010927	58.8	CATCAACCAGTATTATGGCTC	58.4	TTTCCTTTGTTACAGCTTCC
M_PTGS1_1 (=COX1)	NM_011198	58.1	CATCCTTATAGGAGAAACCATC	60.8	GTTTCGATATTGGAACTGGG
M_PTGS2_1 (=COX2)	NM_008969.4	53.3	ACTATAGGAGAGACTATCAAG	57.2	GAGTGTGTTGAATTCAGAGG
M_TLR4_1	NM_021297	58.1	GATCAGAAACTCAGCAAAGTC	61.0	TGTTTCAATTTCACACCTGG
