# Supplementary material for: β Boswellic Acid Blocks Articular Innate Immune Responses: An In Silico and In Vitro Approach to Traditional Medicine
Source: Antioxidants (Basel). 2023 Feb 3;12(2):371. doi: 10.3390/antiox12020371 (PMC9952103; doi:10.3390/antiox12020371)
Supplement: Supplementary file 1 [file antioxidants-12-00371-s001.zip › Supplementary data S2.xlsx]

## Sheet: Hoja1
	DDA enriched categories		Selected marker
ROS	Aspartic-type signal peptiase activity		NO2-
			NOS2
TLR4 /IL1R	IRAK4 deficiency (TLR2/4)		TLR4
	IRAK1 recruits complex		IL1R1
	Toll Like Receptor 4 (TLR4) Cascade
TNF	TNF signaling		TNFα
	TNFR2 non-canonical NFkB pathway
IFNαβ	Activation of IRF3/IRF7 mediated TBK1/IKK epsilon		IFNB1
	Dex/H-box helicases actívate type I IFN and inflammatory cytokines production		MCP1
	IKK complex recruitment mediated by RIP1
	Interferon Alpha /beta signaling
	TICAM1-dependent activation of IRF3/IRF7
	RIP-mediated NFkB activation via ZBPI
	STAT6-mediated induction of chemokines
MAPK p38 & NFkB	p38	p38MAPK events	p38
		RAF-independent MAPK1/3	HSP90A1
		MAPK1 (ERK2) activation
		MAPK3 (ERK1) activation
	NFkB	NF-kB is activated and signals survival
		RIP-mediated NFkB activation via ZBPI
		RIP1-mediated complex recruitment
	Inflammation	Interleukin-15 signaling	NOS2
		Interleukin-10 signaling	IL6
		Interleukin-2 signaling	LCN2
		Interleukin-20 signaling	COX1
		Interleukin-21 signaling	COX2
		Interleukin-23 signaling	ICAM1
		Interleukin-27 signaling	VCAM1
		Interleukin-35 signaling	MCP1
		Interleukin-6 signaling	NAMPT
		Interleukin-3, Inteleukin-5 and GM-CSF signaling	*IL1B
		Interleukin-9 signaling
		IL-6-type cytokine receptor ligand interactions
		Other interleukin signaling
		Cell adhesión molecule activity
	Anabolism & Catabolism	Chondroitin sulfate biosynthesis	MMP1
		Dematan sulfate biosyntesis	MMP3
		ECM proteoglycans	MMP9
		Activation of Matrix Metalloproteinases	MMP13
		Collagen biosynthesis and modifying enzymes	ADAMTS4
		Collagen chain trierization	ACAN
		Metalloprotease DUBs	COL1A1
		Metallopeptidase activity	COL2A1
		Cell adhesión molecule activity
NLRP3	Interleukin-1 processing		NLRP3
	The NLRP3 inflammasome		CASP1
			IL1B
